# Supplementary material for: A facile one-pot synthesis of 2,3-diarylated benzo[b]furans via relay NHC and palladium catalysis
Source: Royal Society of Chemistry journal article supplement (doi:10.1039/c5ob02336j), 2016-01-01
Supplement: c5ob02336j1.pdf [file c5ob02336j1.pdf]

## Supporting Information

### **A facile one-pot synthesis of 2,3-diarylated benzo[*b*]furans via relay NHC and palladium catalysis**

**Yanyan Jia, Tuanjie Li,\* Chenxia Yu, Bo Jiang and Changsheng Yao \***

*School of Chemistry and Chemical Engineering, and Jiangsu Key Laboratory of Green Synthetic Chemistry for Functional*

*Materials, Jiangsu Normal University, Xuzhou 221116, Jiangsu, China*

[ltj2008@jsnu.edu.cn](mailto:ltj2008@jsnu.edu.cn); [csyao@jsnu.edu.cn](mailto:csyao@jsnu.edu.cn)

## Table of Contents

|                                                                                       |       |
|---------------------------------------------------------------------------------------|-------|
| 1. General information .....                                                          | S3    |
| 2. Characterization of <b>3aa</b> .....                                               | S3    |
| 3. Synthesis and characterization of <b>3a</b> from the intermediate <b>3aa</b> ..... | S4    |
| 4. Evidences for compatibility of NHC and Pd catalysts .....                          | S5-S6 |
| 5. NMR Spectra .....                                                                  | S7-21 |

## 1. General information

Common reagents and materials were purchased from commercial sources and purified by recrystallization or distillation. Melting points were determined in open capillaries and were uncorrected. IR spectra were taken on a FT-IR-Tensor 27 spectrometer in KBr pellets and reported in  $\text{cm}^{-1}$ .  $^1\text{H}$  NMR spectra were measured on a Bruker DPX 400 MHz spectrometer in  $\text{CDCl}_3$  or  $\text{DMF-}d_7$  (100 MHz,  $^{13}\text{C}$  NMR) with chemical shift ( $\delta$ ) given in ppm relative to TMS as internal standard. High-resolution mass spectra (HRMS) were obtained on a micrOTOF-Q II HRMS/MS instrument (Bruker) with the technique of atmospheric pressure ionization.

## 2. Characterization of **3aa**

**2-(2-bromophenyl)-1-(4-chlorophenyl)-2-phenylethanone (3aa)**. white solid; M.P.: 106 - 107 °C;  $^1\text{H}$  NMR (400 MHz,  $\text{CDCl}_3$ ):  $\delta$  7.97 - 7.94 (m, 2H, ArH), 7.62 - 7.60 (m, 1H, ArH), 7.40 - 7.26 (m, 7H, ArH), 7.24 - 7.22 (m, 1H, ArH), 7.16 - 7.12 (m, 1H, ArH), 7.04 - 7.02 (m, 1H, ArH), 6.40 (s, 1H, CH);  $^{13}\text{C}$  NMR (100 MHz,  $\text{CDCl}_3$ ):  $\delta$  196.3, 139.6, 138.8, 136.7, 134.8, 133.0, 131.0, 130.3, 129.6, 129.1, 129.0, 128.9, 127.7, 127.6, 124.9, 59.1.

### 3. Synthesis of **3a** from the intermediate **3aa** and compound characterization

#### 2-(4-chlorophenyl)-3-phenylbenzofuran (**3a**)

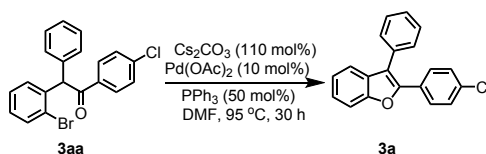

An oven-dried 25-mL flask equipped with a magnetic stir bar was charged with 2-(2-bromophenyl)-1-(4-chlorophenyl)-2-phenylethanone (**3aa**, 191.9 mg, 0.5 mmol),  $\text{Cs}_2\text{CO}_3$  (179.2 mg, 0.55 mmol), freshly distilled DMF (5 mL),  $\text{Pd}(\text{OAc})_2$  (11.2 mg, 0.05 mmol) and  $\text{PPh}_3$  (65.6 mg, 0.25 mmol). The mixture was stirred at 95 °C until completion (monitored by TLC, 30 h). Deionized water (5 mL) was added and the mixture then extracted with EtOAc. The organic layer was dried over  $\text{MgSO}_4$ . The desired product **3a** (129 mg, 85 %) were obtained through filtration, concentration in vacuo and purification by column chromatography (silica gel, petroleum). white solid; M.P.: 90 - 92 °C;  $^1\text{H}$  NMR (400 MHz,  $\text{CDCl}_3$ ):  $\delta$  7.60 - 7.57 (m, 2H, ArH), 7.55 (d,  $J$  = 8.0 Hz, 1H, ArH), 7.50 - 7.40 (m, 6H, ArH), 7.36 - 7.32 (m, 1H, ArH), 7.30 - 7.22 (m, 3H, ArH);  $^{13}\text{C}$  NMR (100 MHz,  $\text{CDCl}_3$ ):  $\delta$  154.0, 149.3, 134.2, 132.5, 130.1, 129.7, 129.1, 129.1, 128.7, 128.2, 127.8, 124.9, 123.1, 120.1, 118.0, 111.1; IR (potassium bromide) ( $\nu$ ,  $\text{cm}^{-1}$ ): 1618, 1608, 1582, 1560, 1483, 1449, 1402, 1253, 1201, 1089, 1064, 1014, 962, 840, 749, 695; HRMS (APCI)  $m/z$ : Calcd. for  $[\text{M}+\text{H}]^+$   $\text{C}_{20}\text{H}_{14}\text{ClO}$ : 305.0733, found: 305.0723.

#### 4. Evidences for compatibility of NHC and Pd catalysts

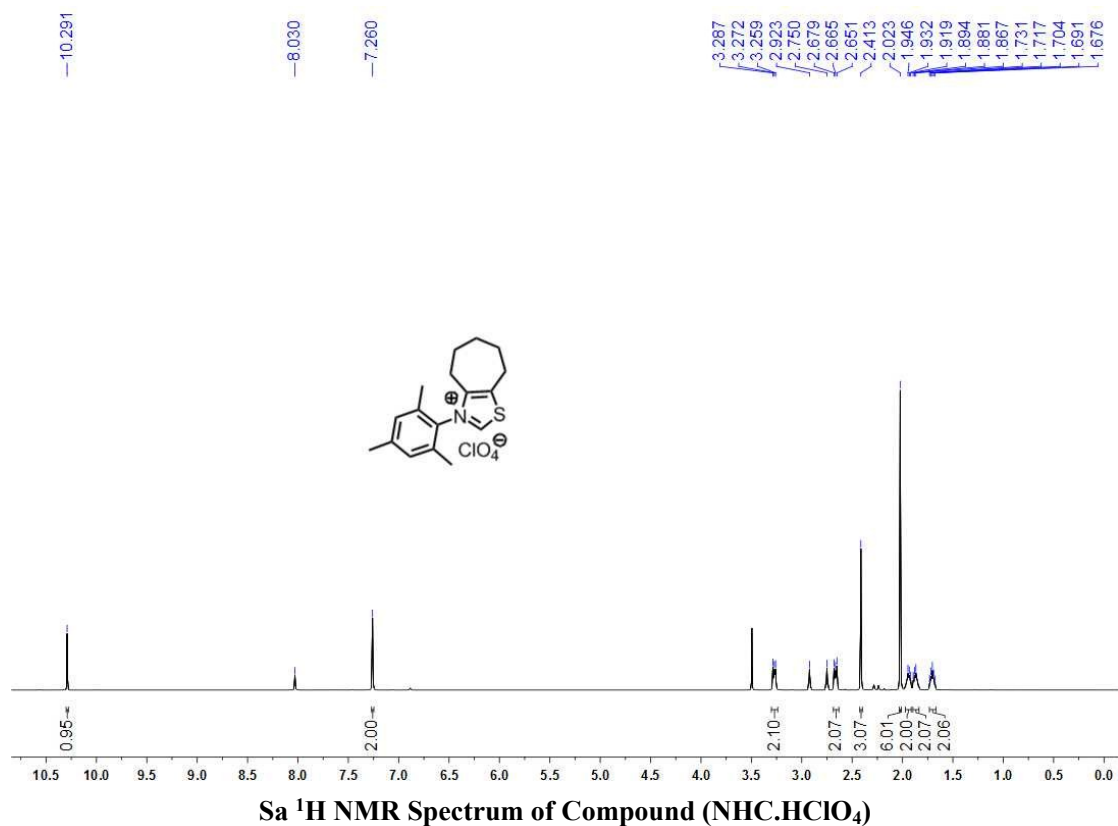

Sa <sup>1</sup>H NMR Spectrum of Compound (NHC.HClO<sub>4</sub>)

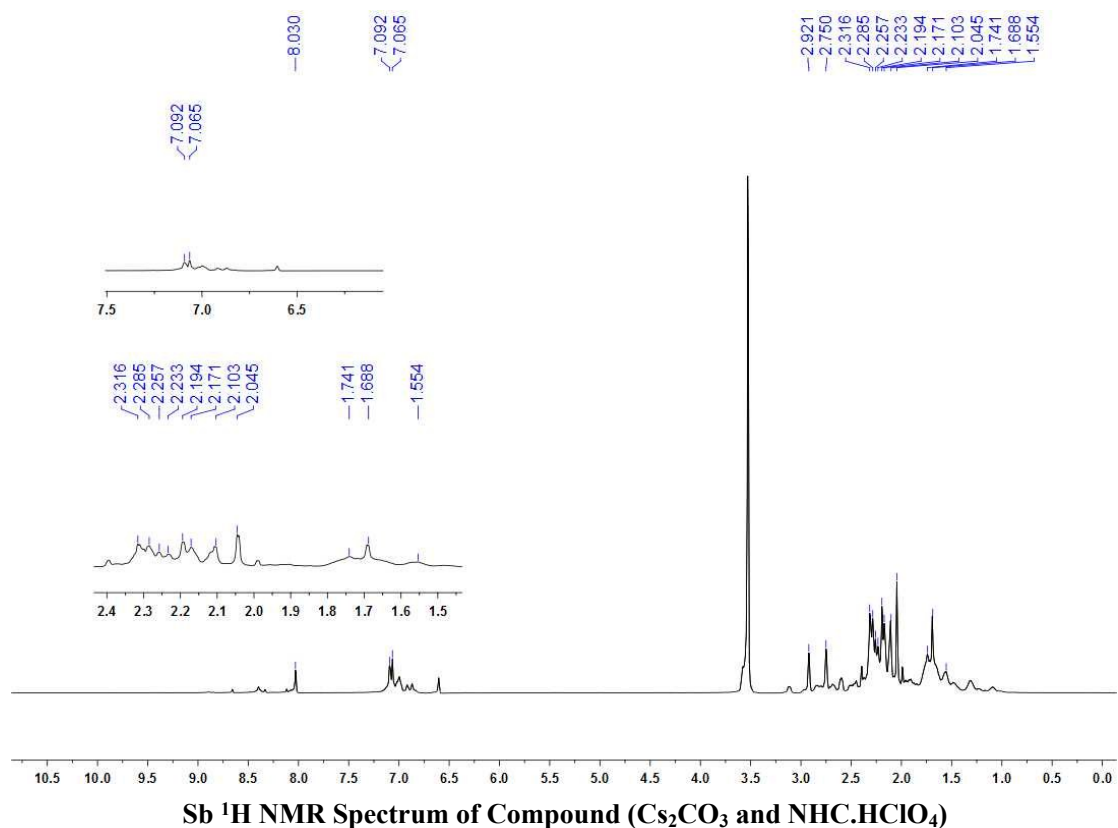

Sb <sup>1</sup>H NMR Spectrum of Compound (C<sub>2</sub>CO<sub>3</sub> and NHC.HClO<sub>4</sub>)

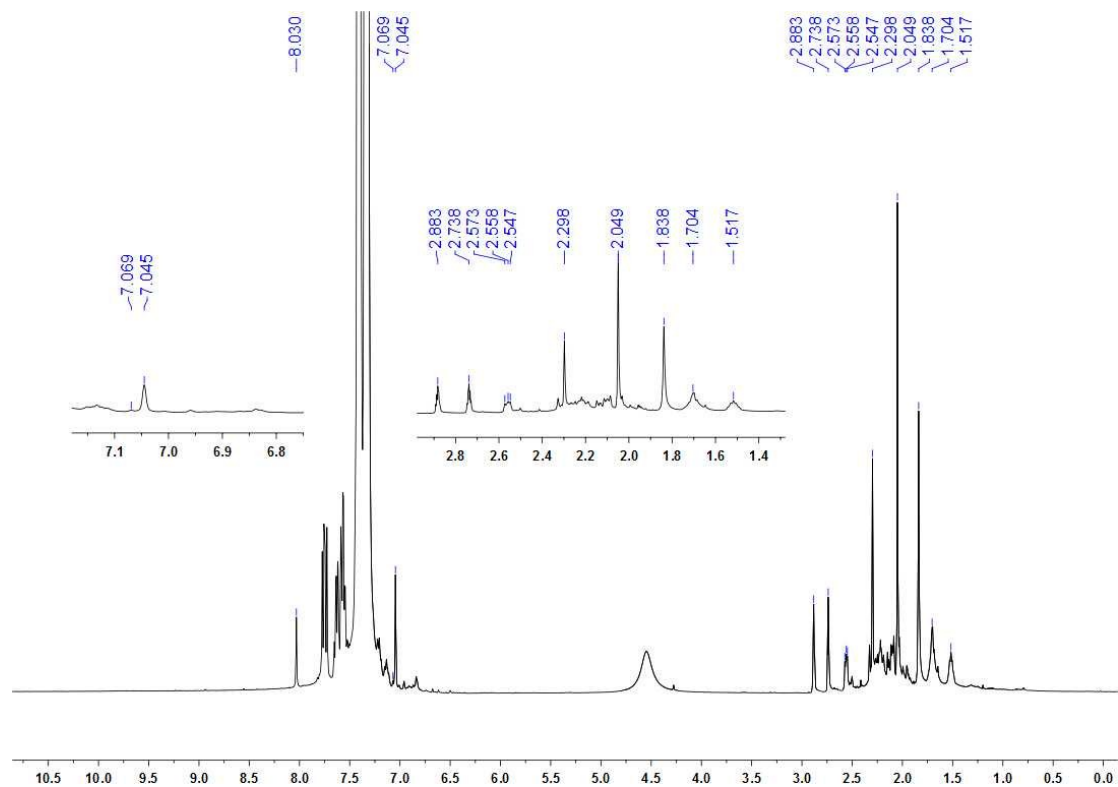

**Sc <sup>1</sup>H NMR Spectrum of Compound (Cs<sub>2</sub>CO<sub>3</sub>, NHC.HClO<sub>4</sub>, Pd(OAc)<sub>2</sub> and PPh<sub>3</sub> (5.0 equiv.))**

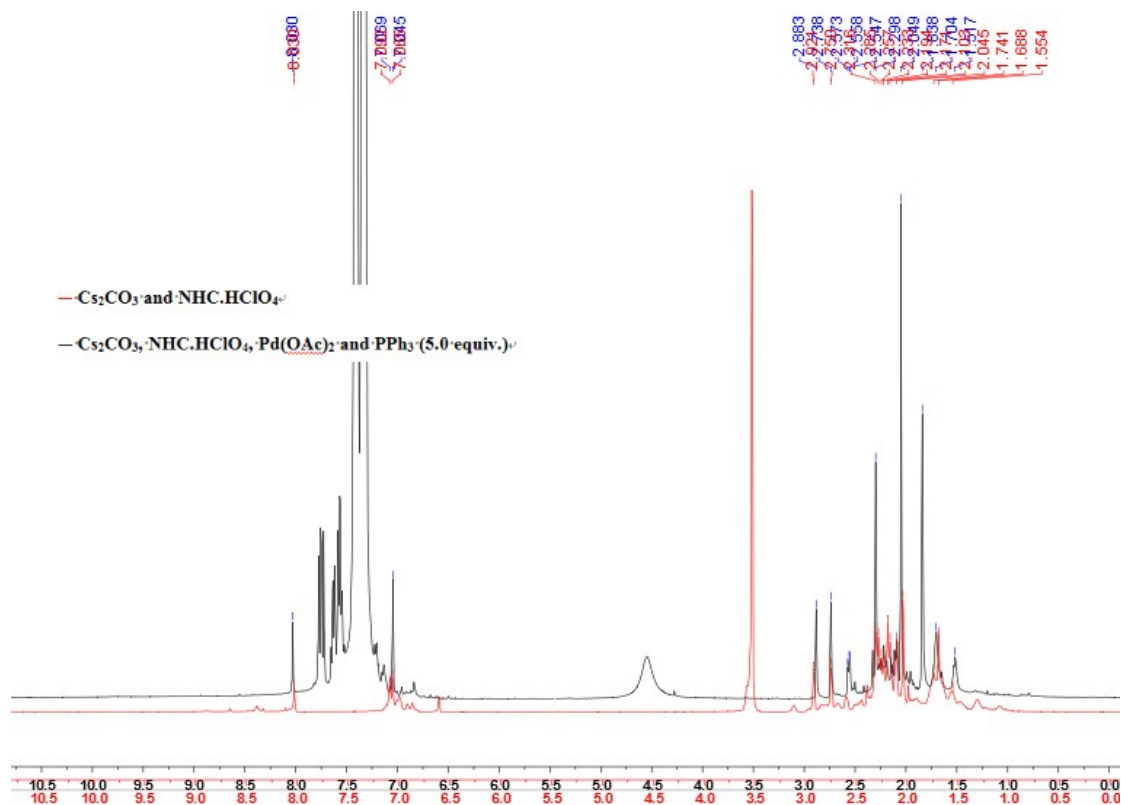

**Sd A superposition of Sb and Sc**

A superposition (**Sd**) of **Sb** and **Sc** showed that no striking discrepancy of chemical shift between these two NMR spectrums, apart from the signal of PPh<sub>3</sub>. Thus, we concluded safely that the complex of NHC and Pd was not formed here.

## 5. NMR Spectra

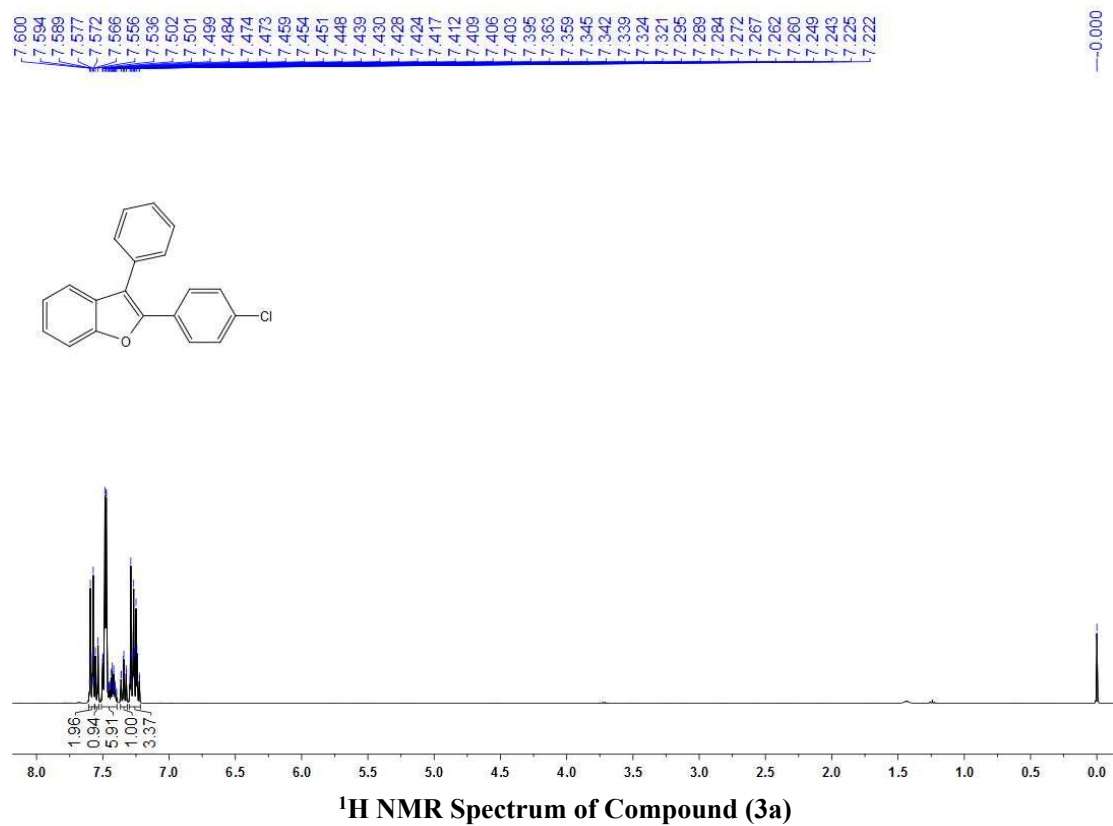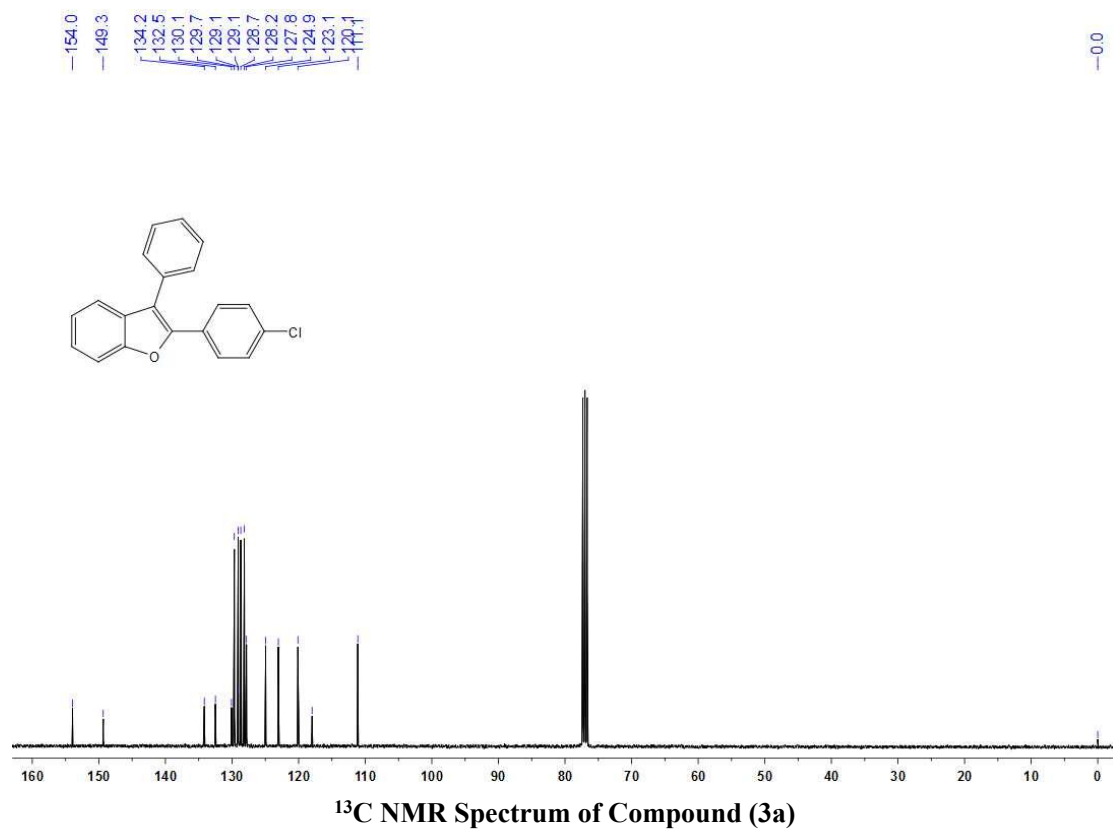

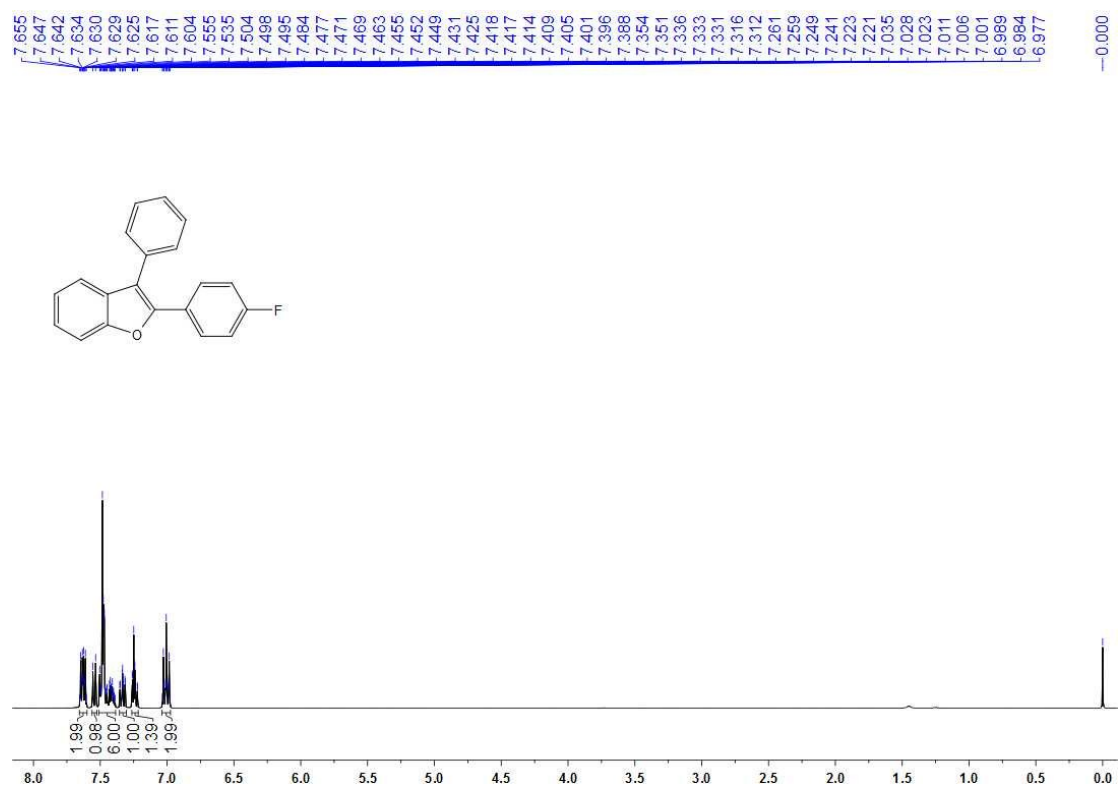

**<sup>1</sup>H NMR Spectrum of Compound (3b)**

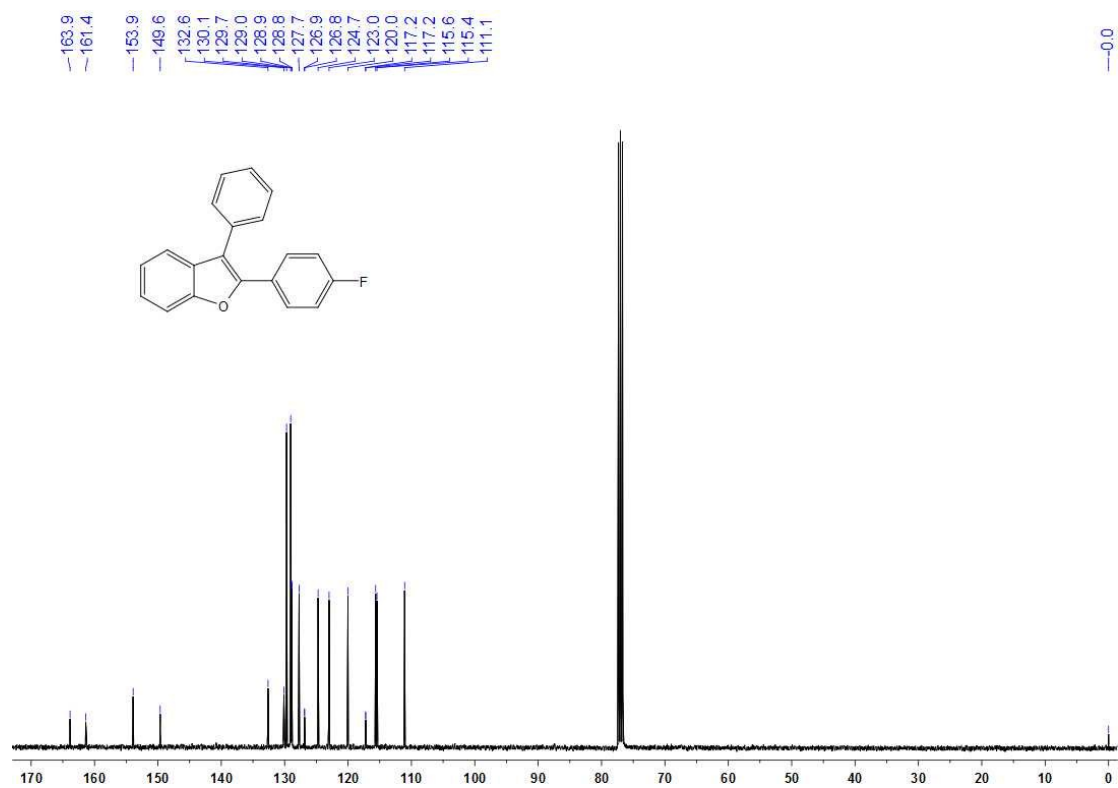

**<sup>13</sup>C NMR Spectrum of Compound (3b)**



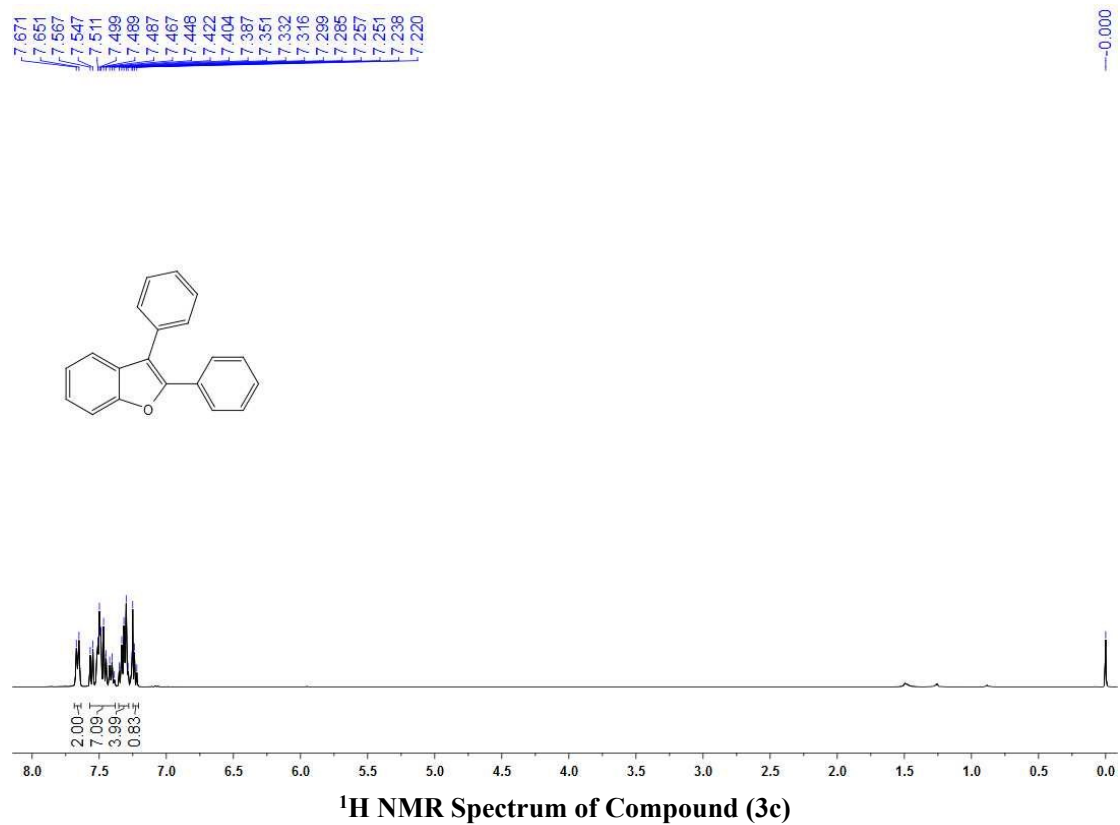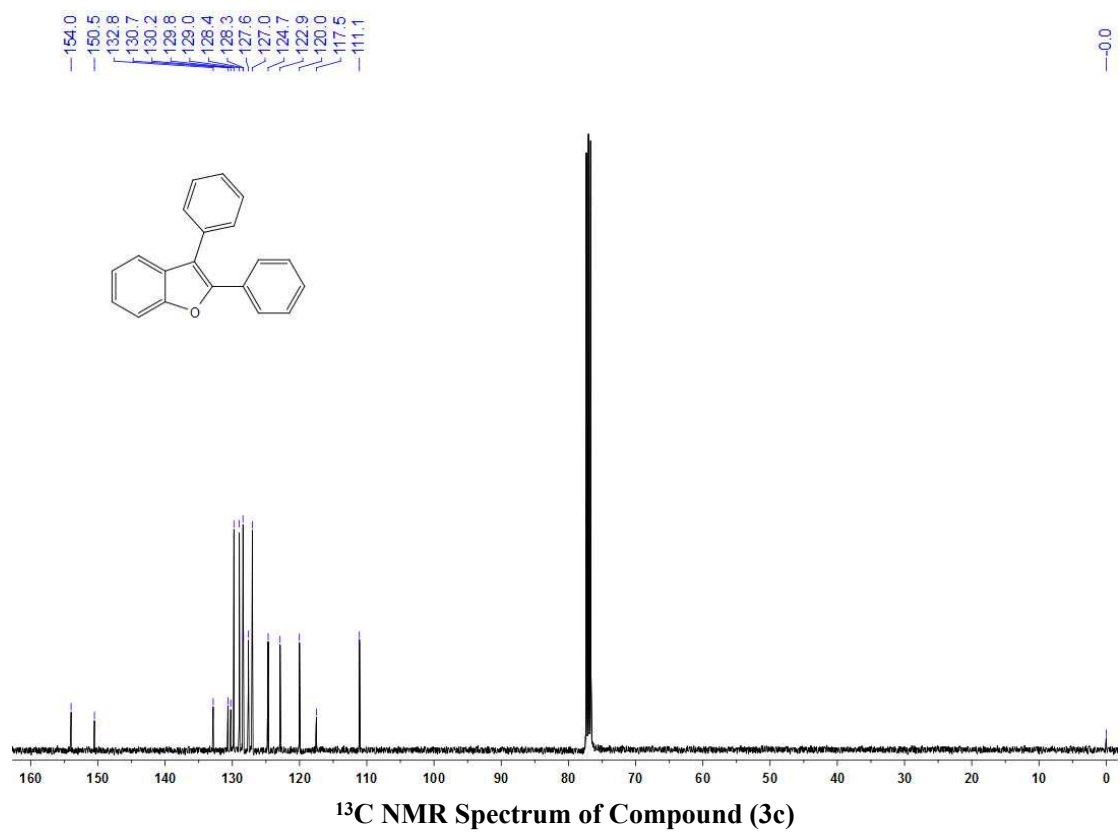

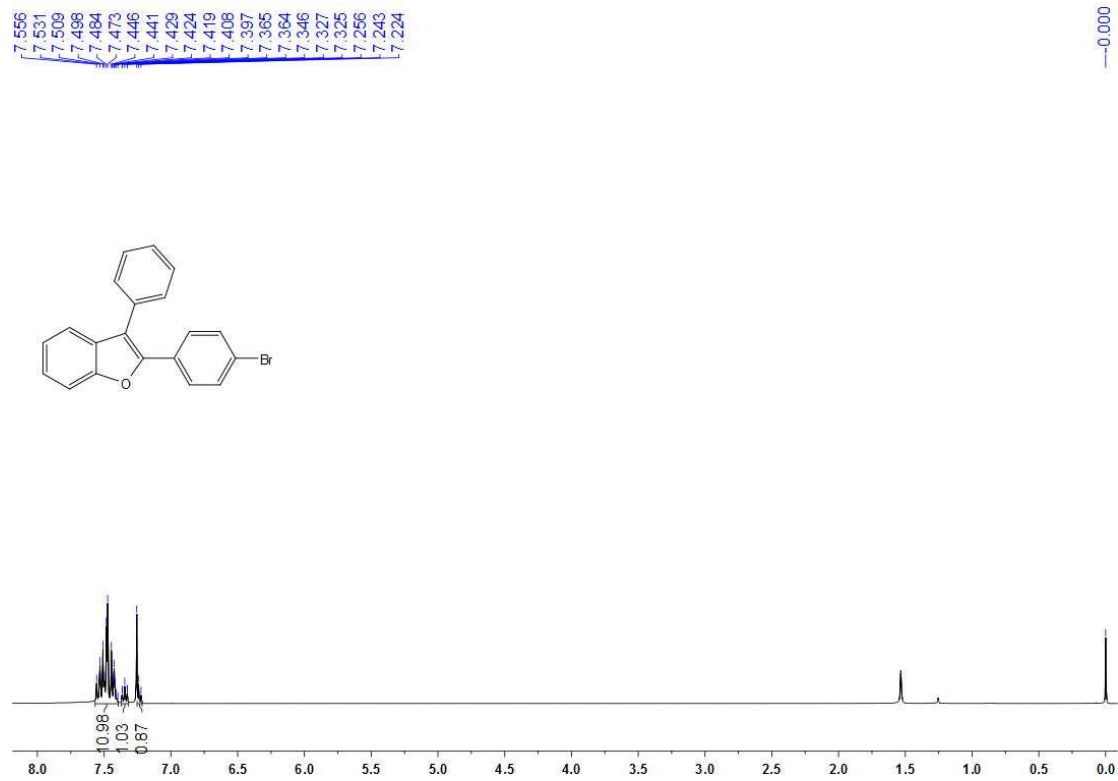

<sup>1</sup>H NMR Spectrum of Compound (3d)

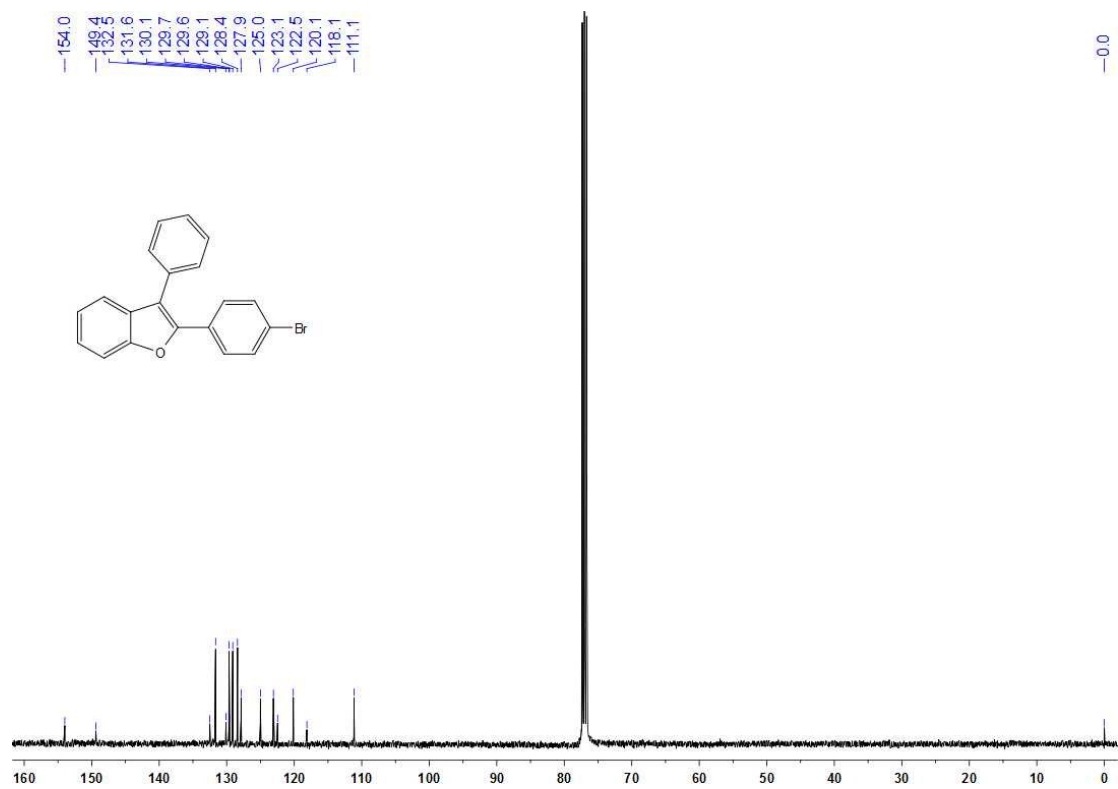

<sup>13</sup>C NMR Spectrum of Compound (3d)

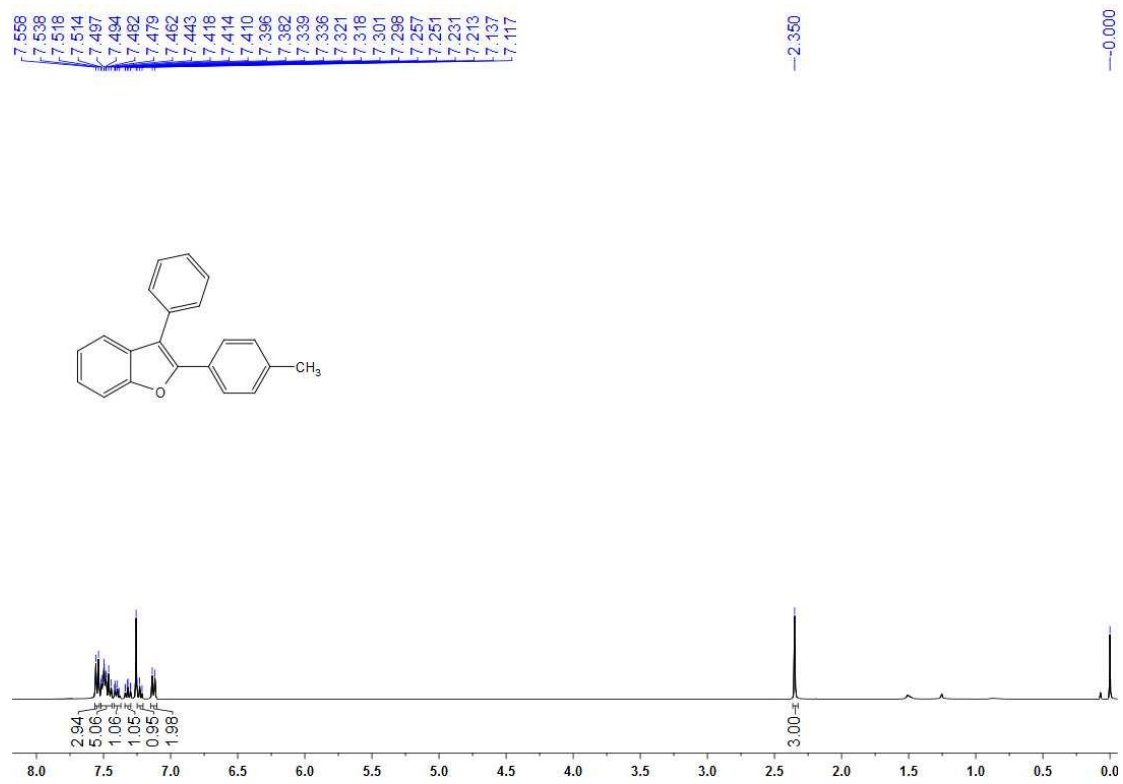

<sup>1</sup>H NMR Spectrum of Compound (3e)

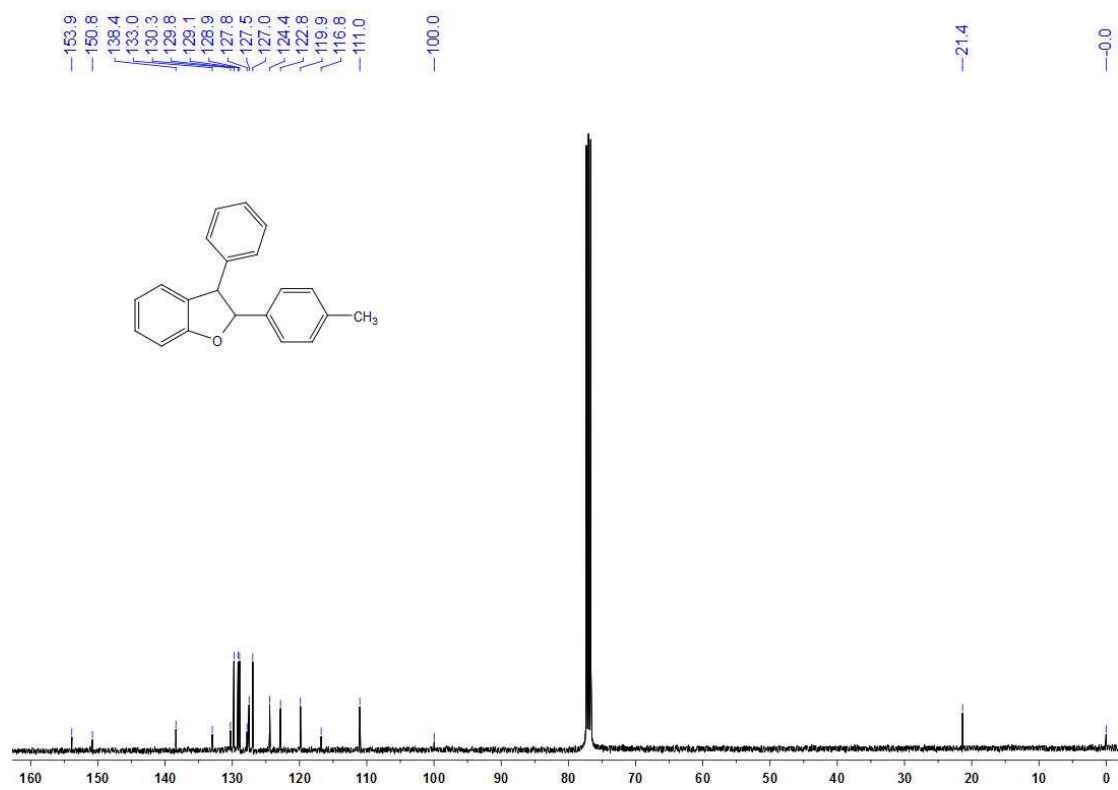

<sup>13</sup>C NMR Spectrum of Compound (3e)

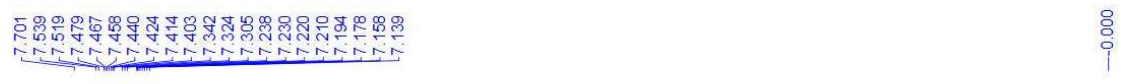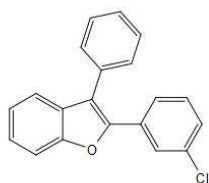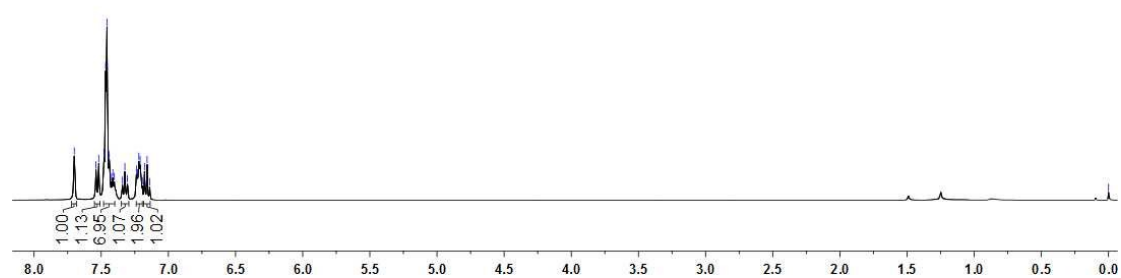

<sup>1</sup>H NMR Spectrum of Compound (3f)

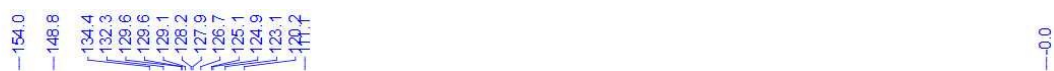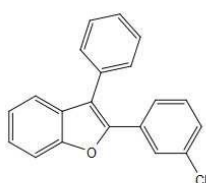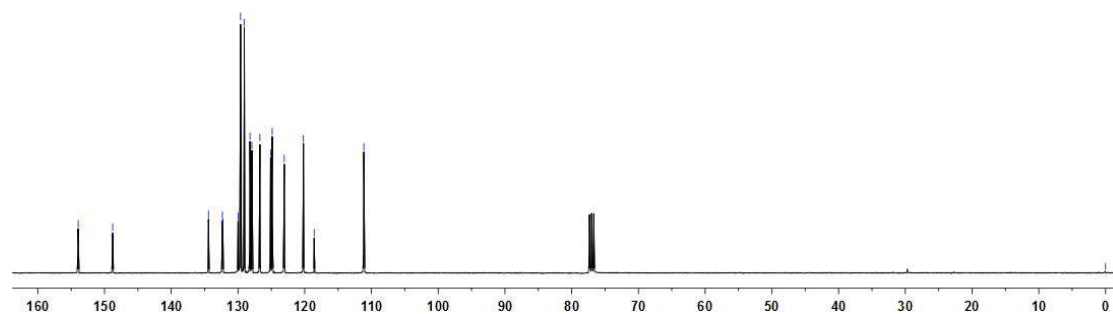

<sup>13</sup>C NMR Spectrum of Compound (3f)

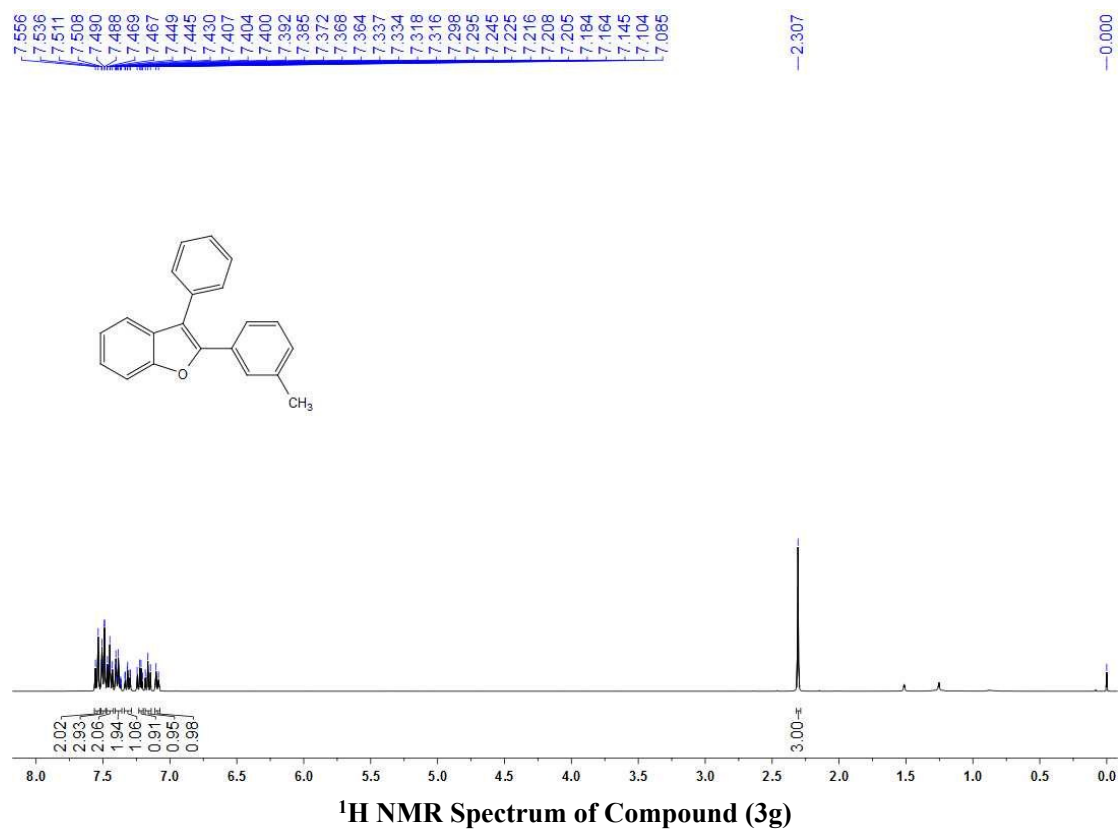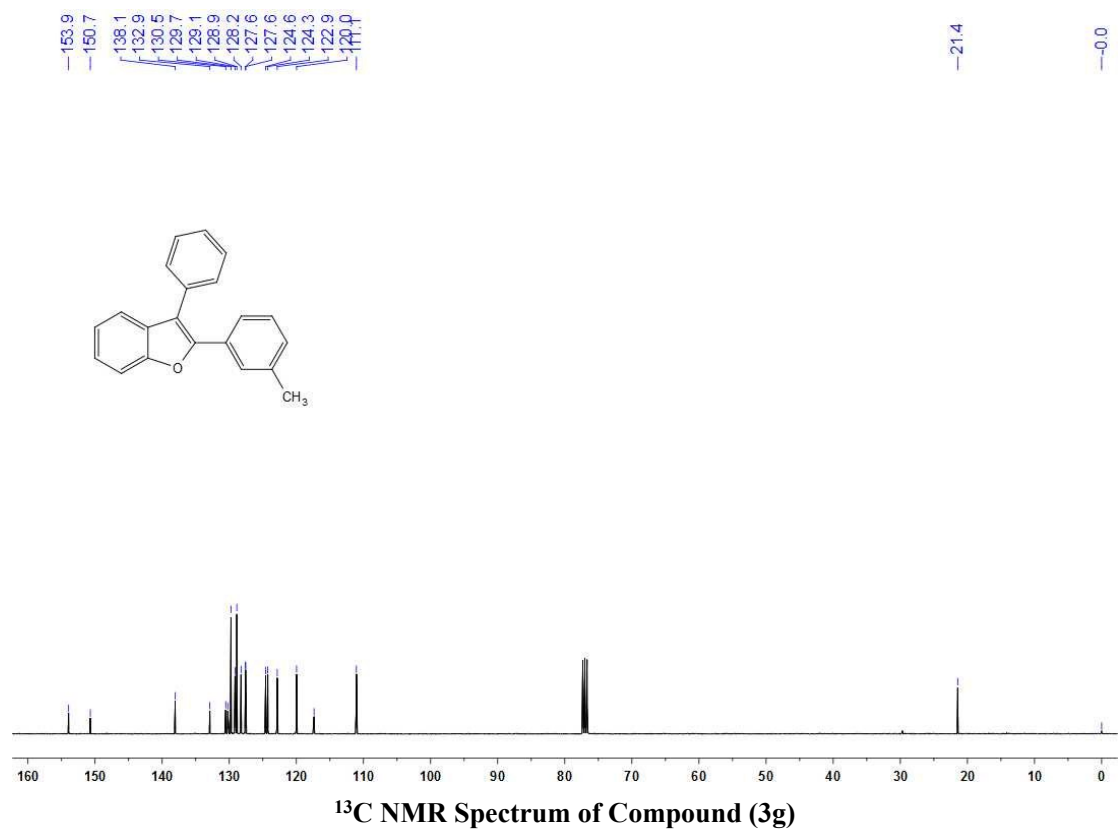

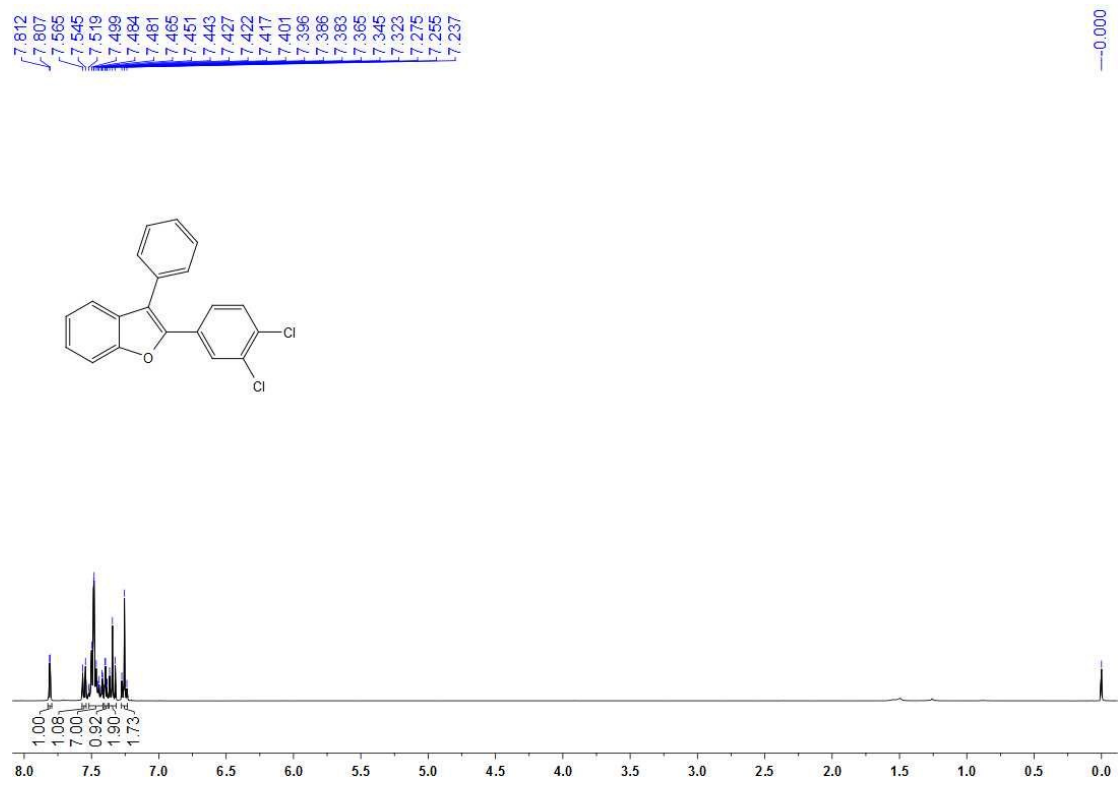

<sup>1</sup>H NMR Spectrum of Compound (3h)

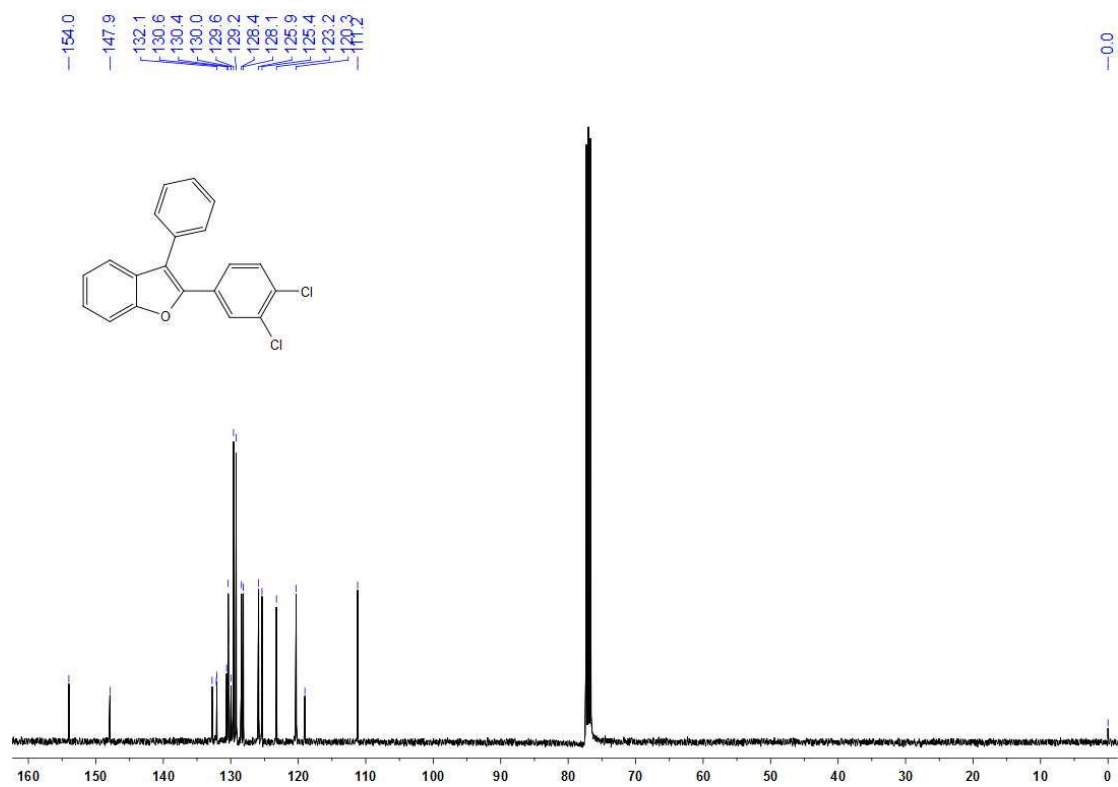

<sup>13</sup>C NMR Spectrum of Compound (3h)

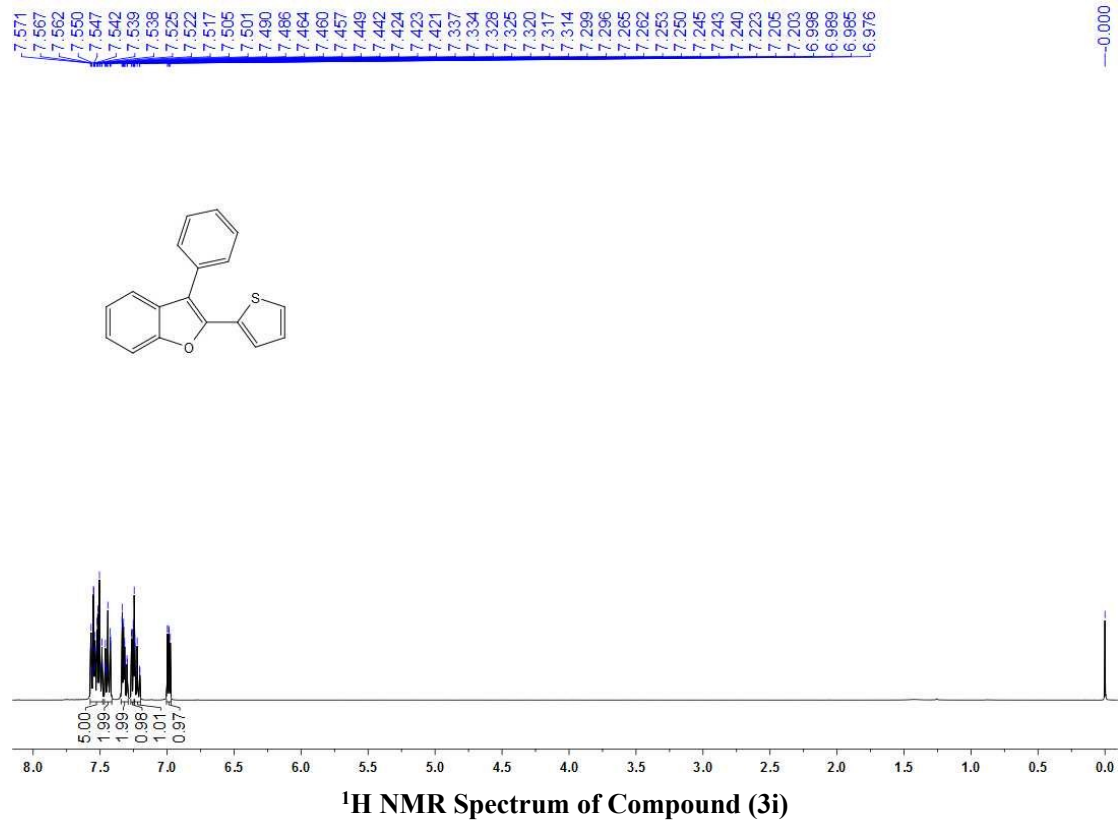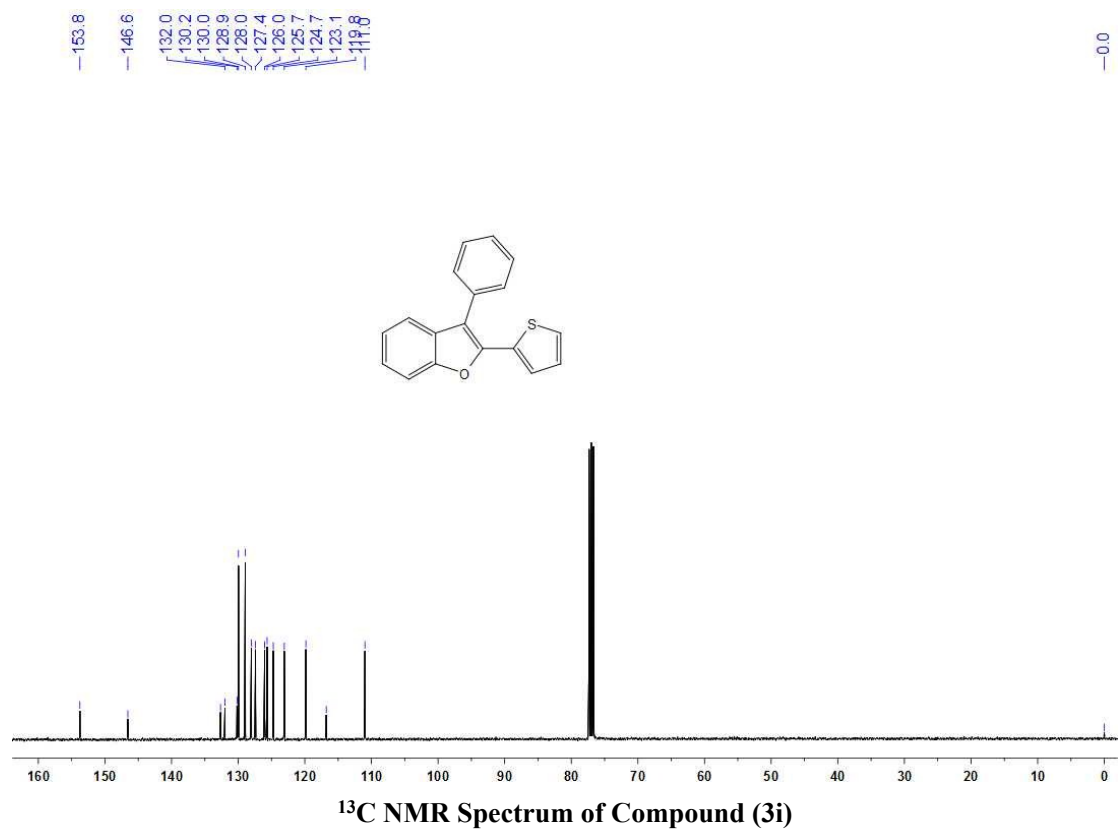

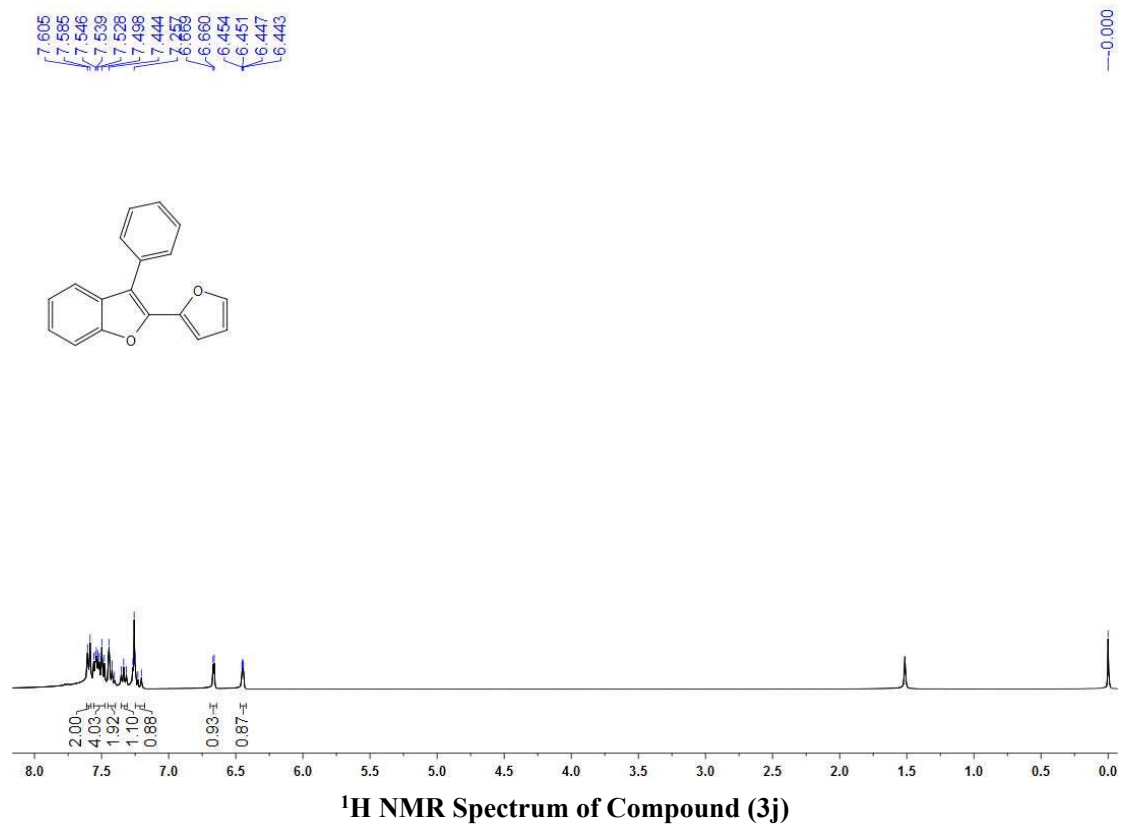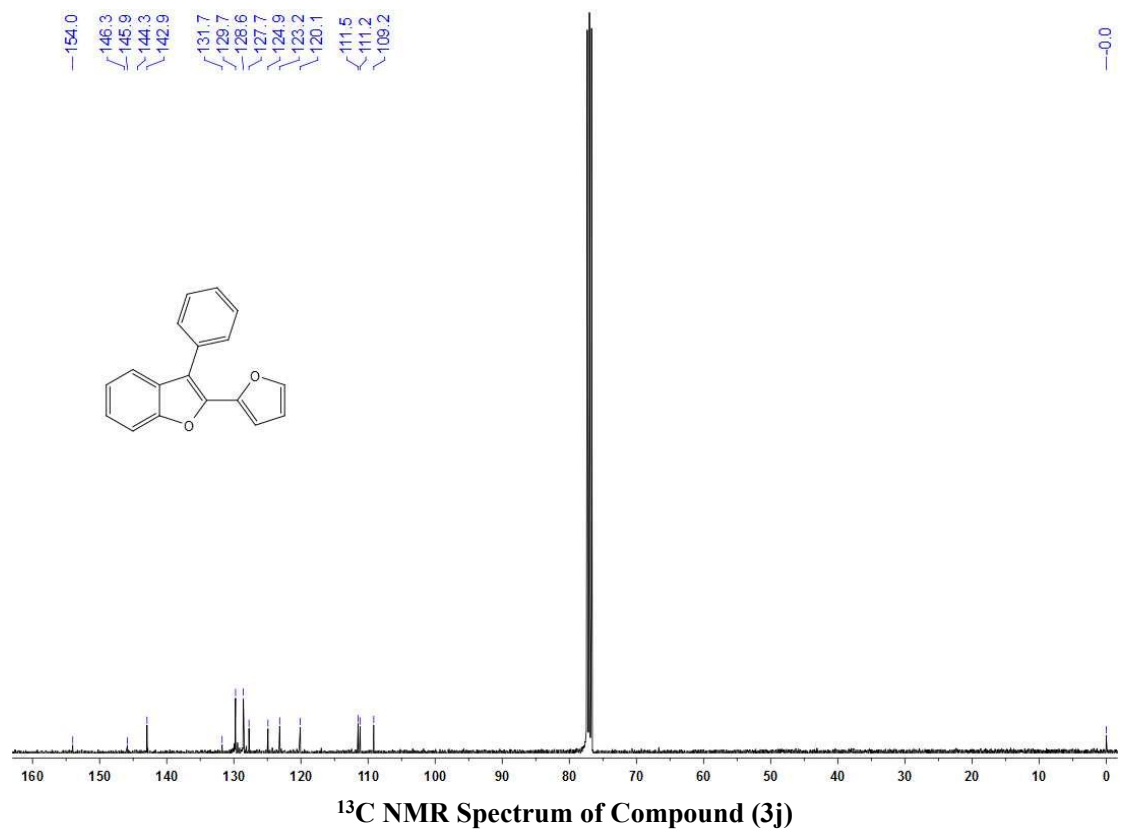



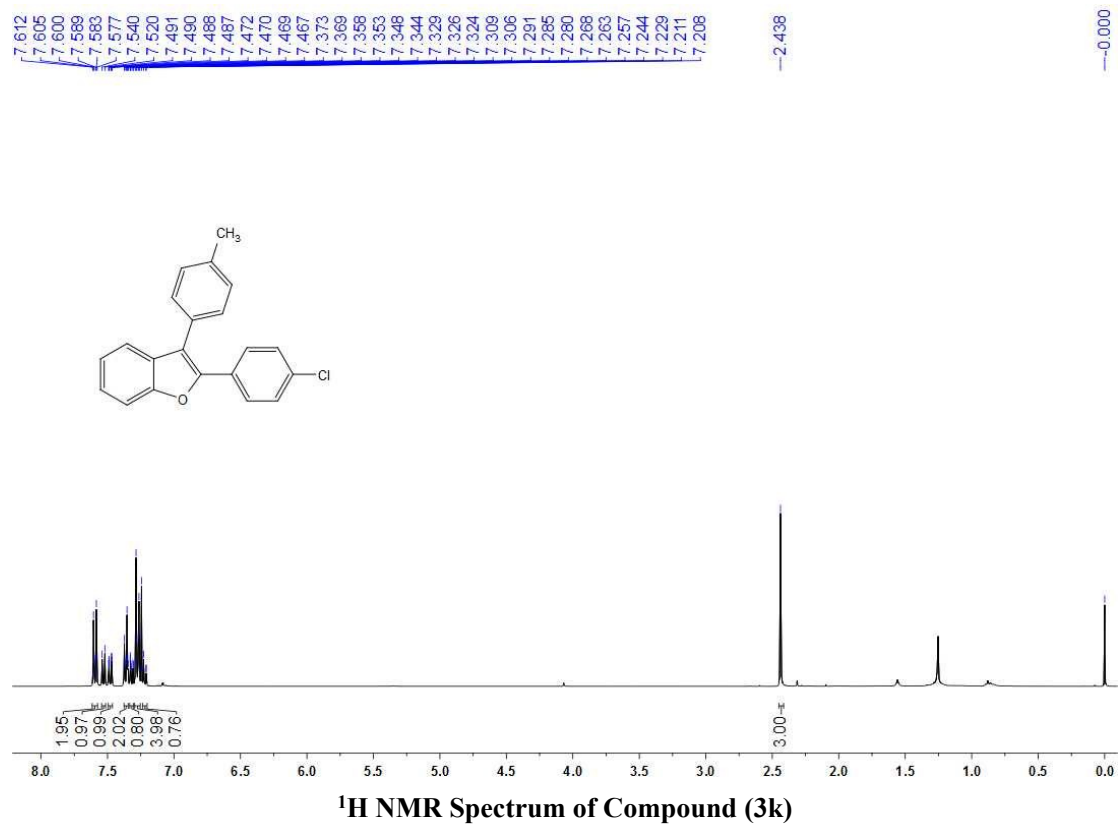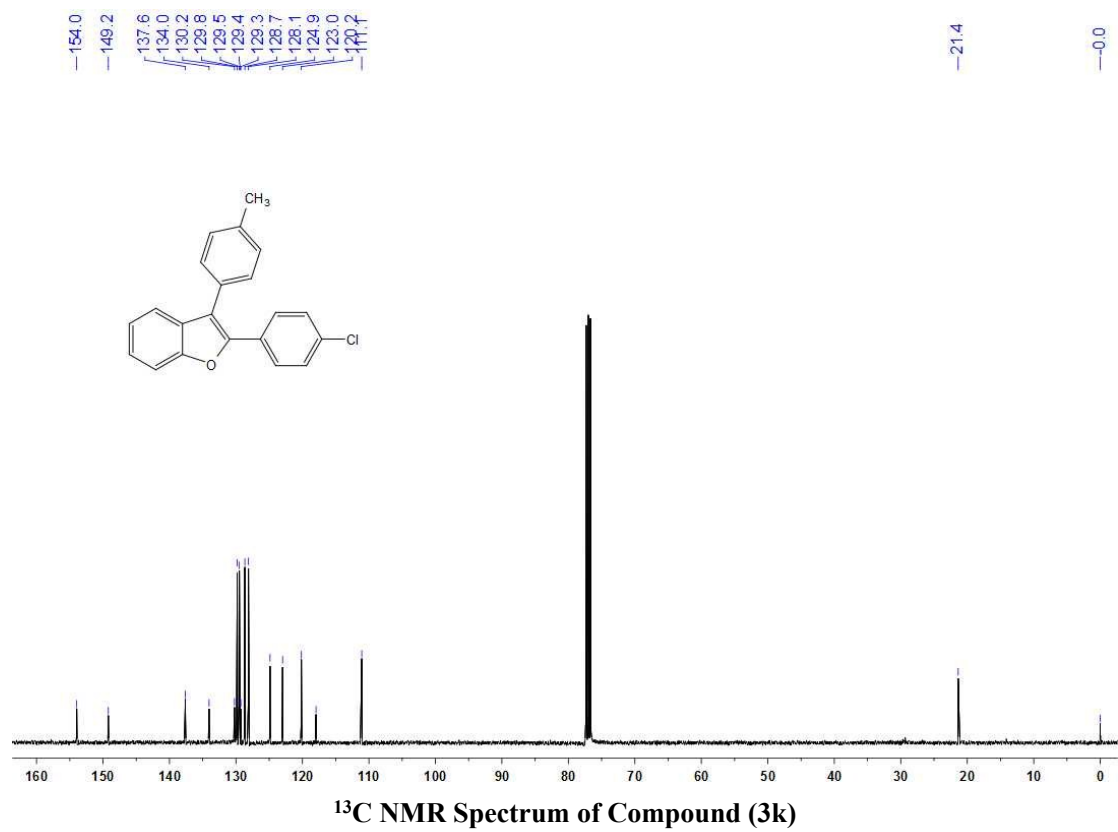

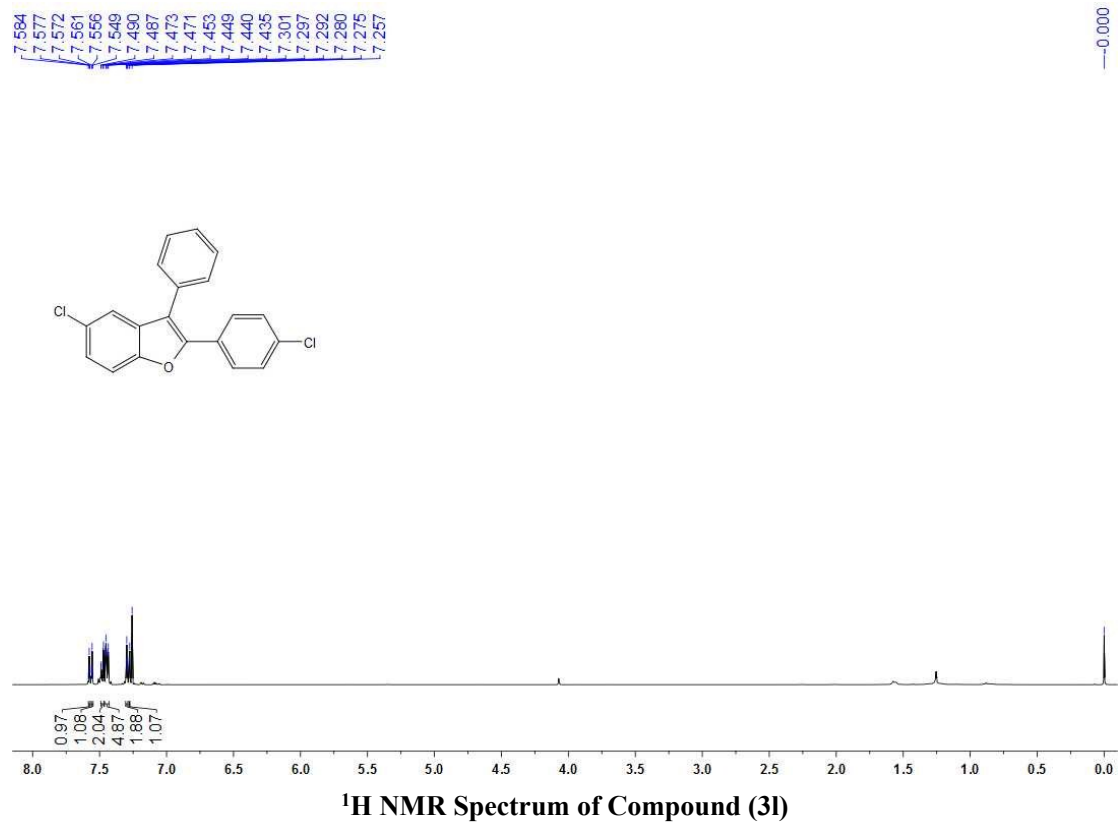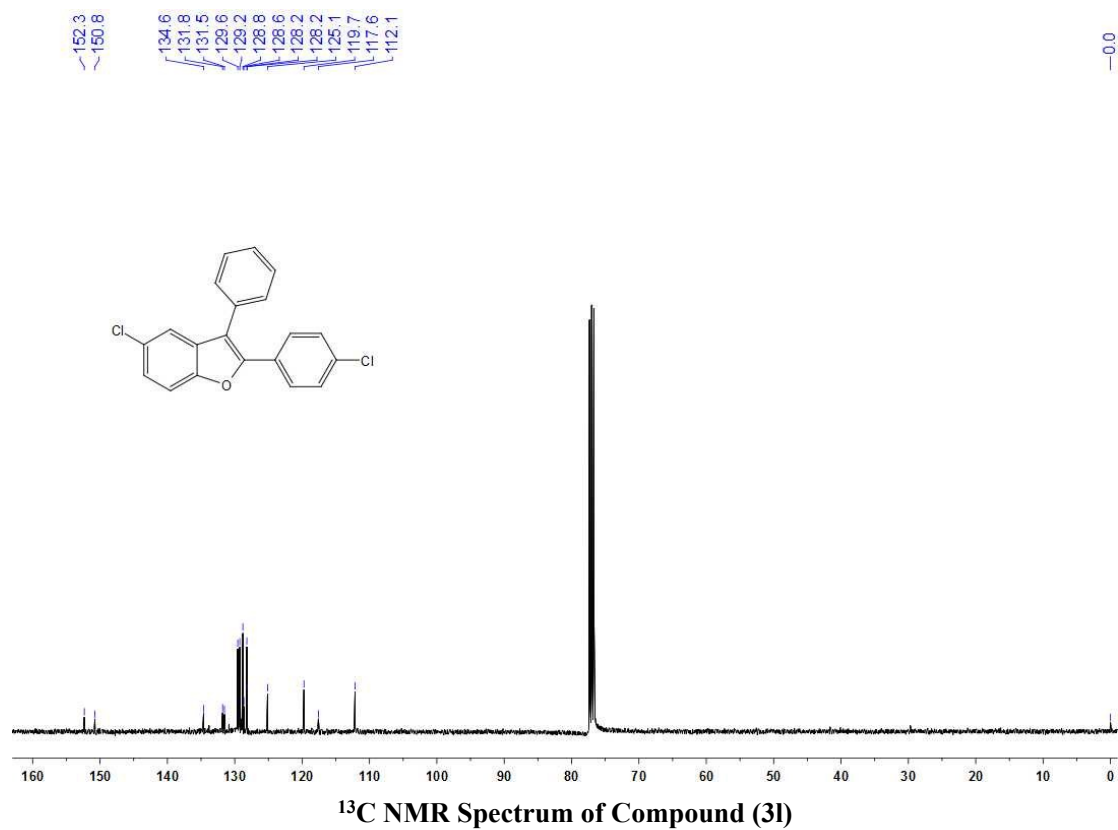

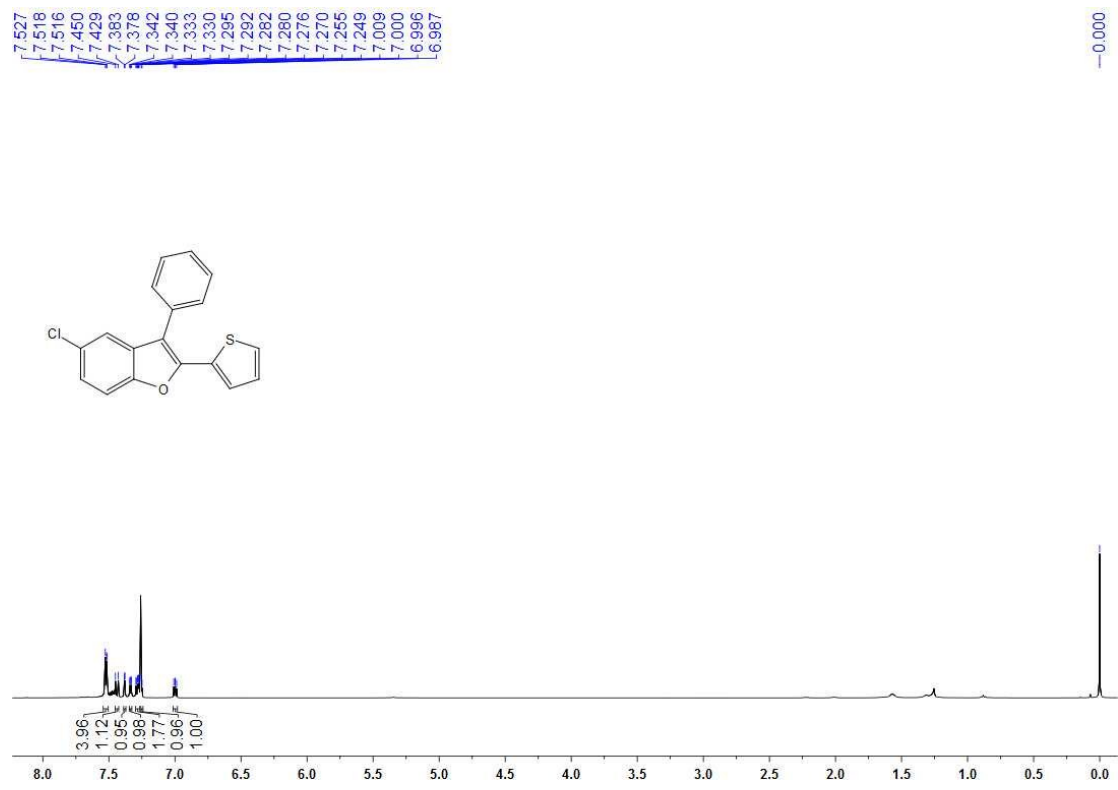

<sup>1</sup>H NMR Spectrum of Compound (3m)

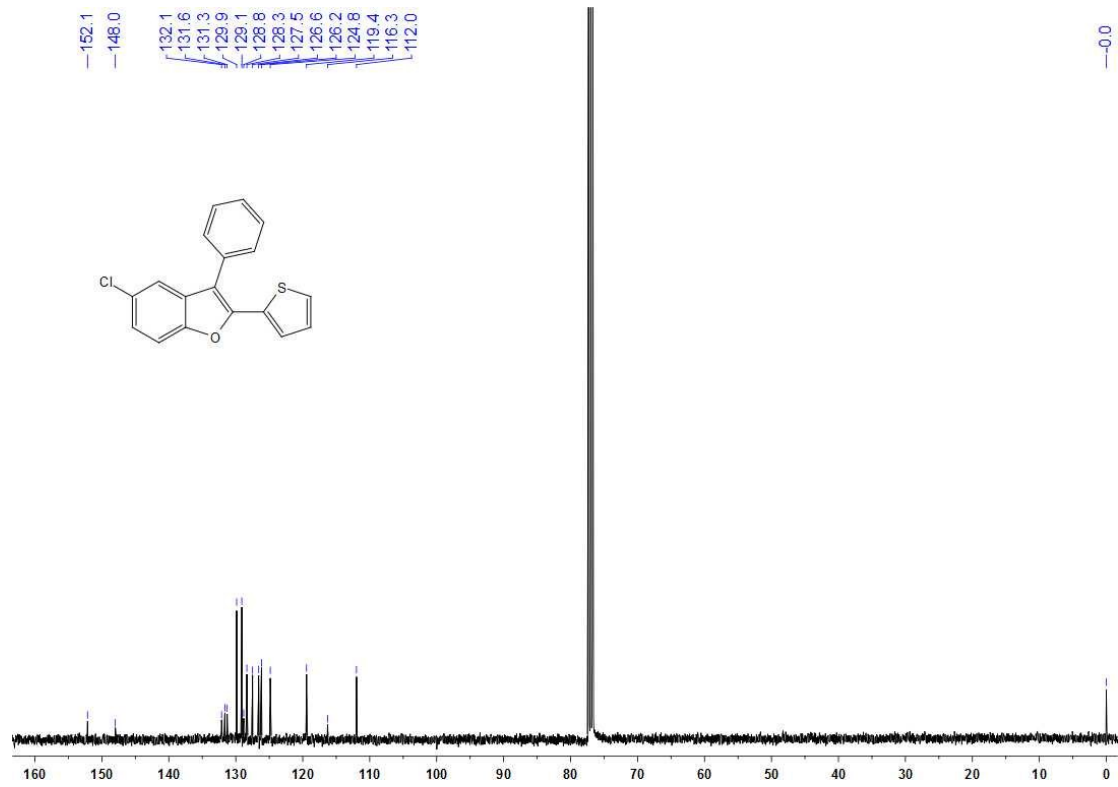

<sup>13</sup>C NMR Spectrum of Compound (3m)

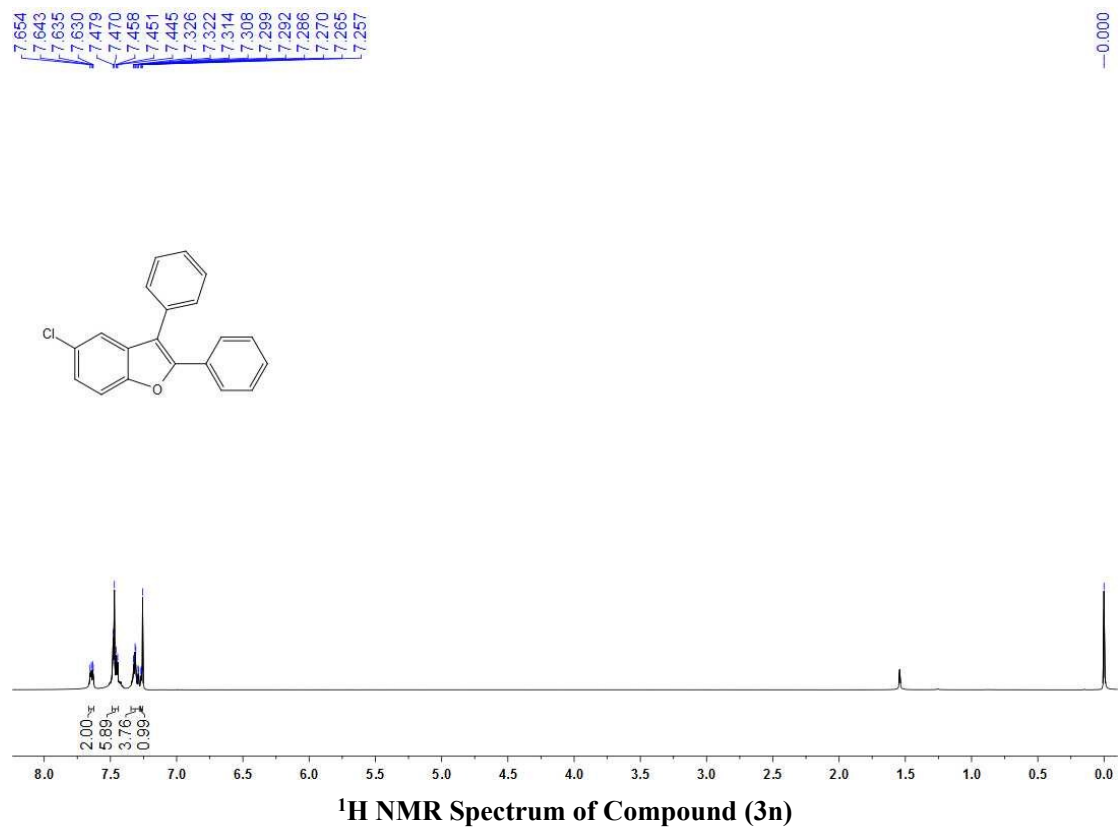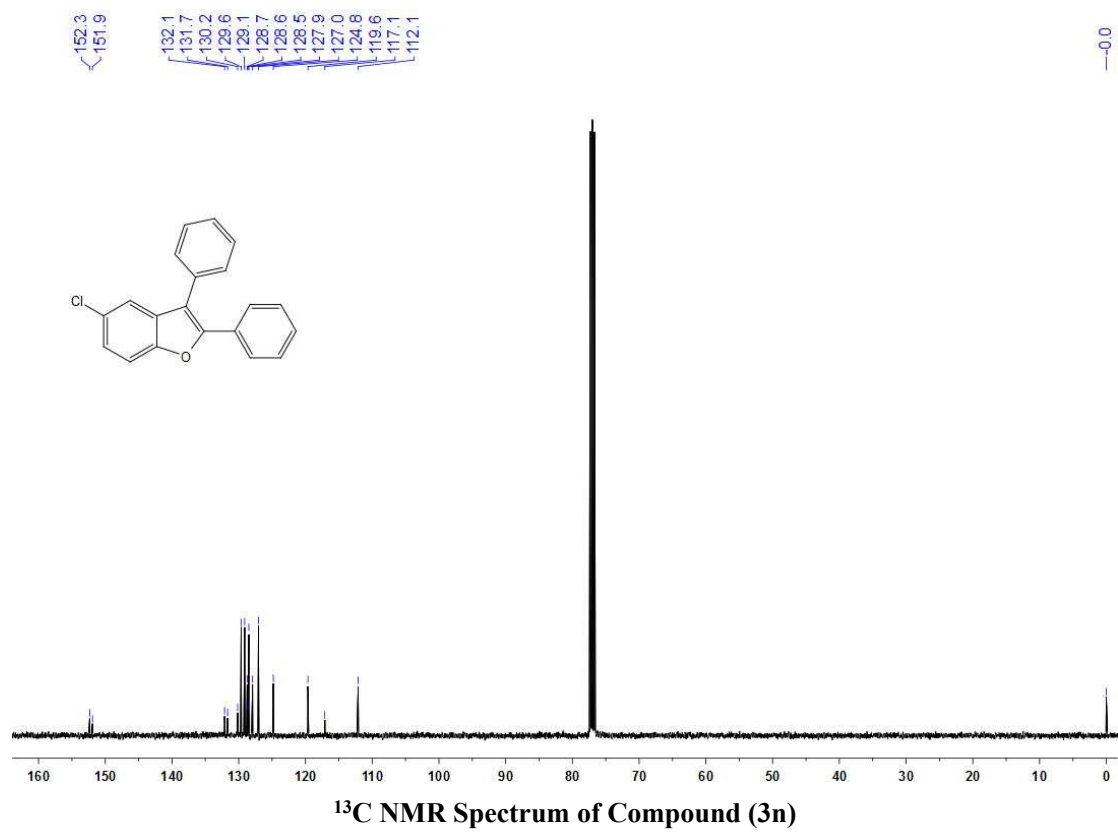

7.963  
7.946  
7.942  
7.395  
7.390  
7.379  
7.374  
7.368  
7.349  
7.283  
7.280  
6.395

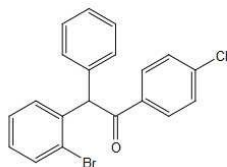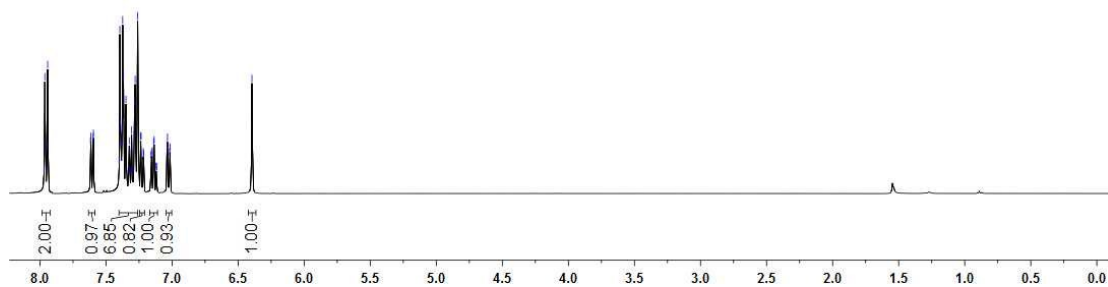

<sup>1</sup>H NMR Spectrum of Compound (3aa)

196.3

139.6  
138.8  
136.7  
134.8  
133.0  
131.0  
130.3  
129.6  
129.1  
128.9  
127.7  
124.9

59.1

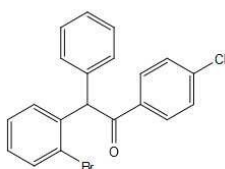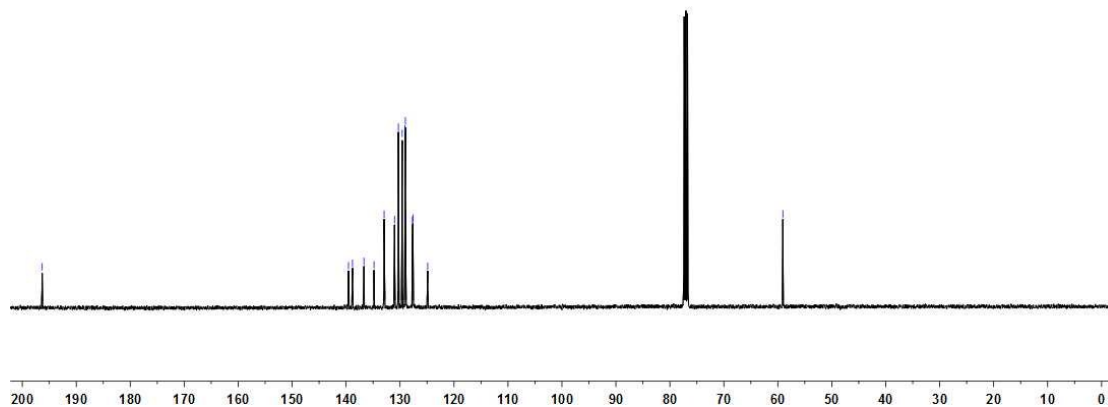

<sup>13</sup>C NMR Spectrum of Compound (3aa)
